# Supplementary material for: Optimal water concentration for aqueous Li+ intercalation in vanadyl phosphate
Source: Royal Society of Chemistry journal article supplement (doi:10.1039/d0sc04647g), 2021-01-01
Supplement: d0sc04647g1.pdf [file d0sc04647g1.pdf]

*Supporting information*

Optimal water concentration for aqueous Li<sup>+</sup> intercalation in vanadyl phosphate

Dan Sun,<sup>1</sup> Masashi Okubo,<sup>1,2</sup> and Atsuo Yamada<sup>1,2,\*</sup>

<sup>1</sup>Department of Chemical System Engineering, School of Engineering, The University of Tokyo,  
Hongo 7-3-1, Bunkyo-ku, Tokyo 113-8656, Japan

<sup>2</sup>Elements Strategy Initiative for Catalysts & Batteries (ESICB), Kyoto University, Nishikyo-ku,  
Kyoto 614-8245, Japan

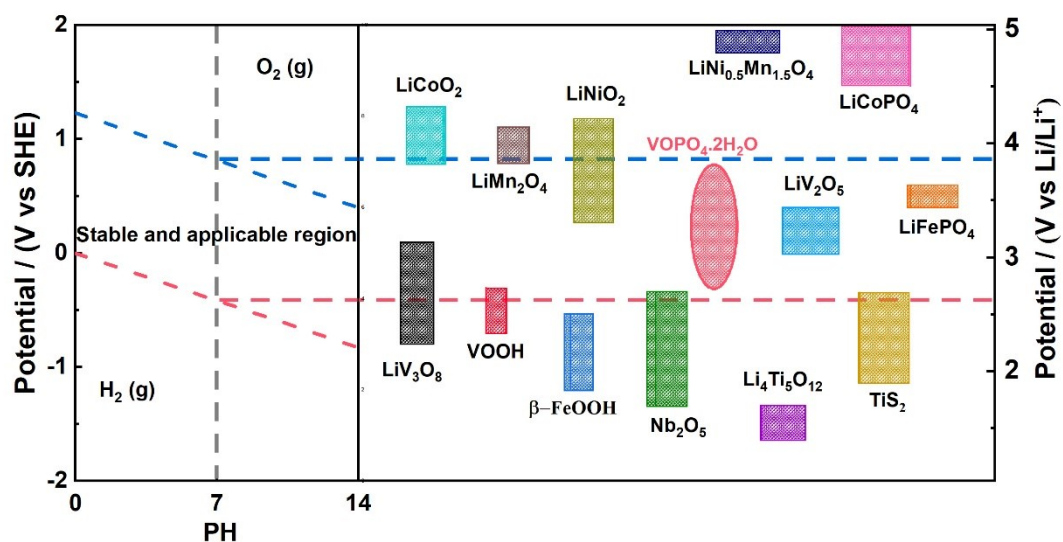

**Figure S1.** Pourbaix diagram of water and electrochemical stability window of lithium intercalation potentials for commonly used electrode materials in the aqueous battery system.

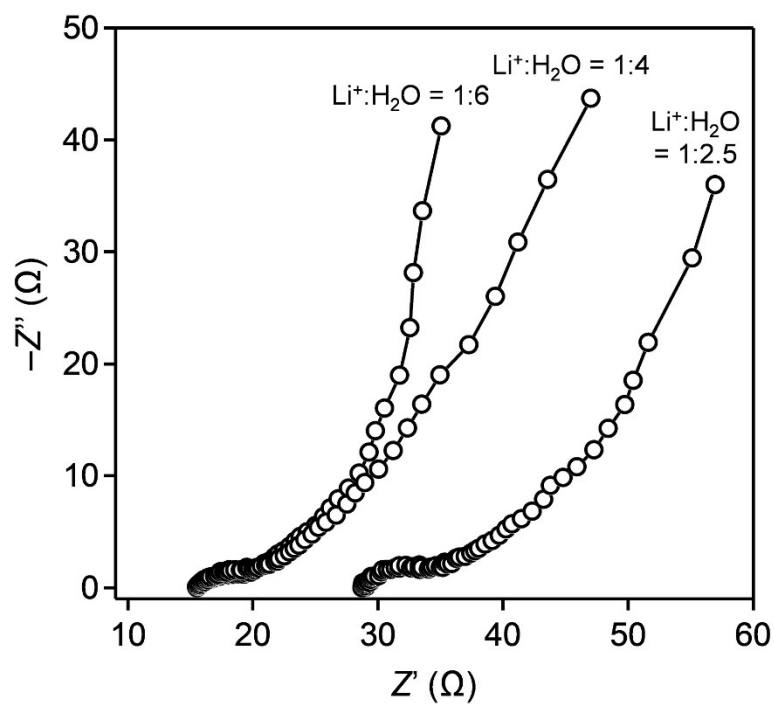

**Figure S2.** Nyquist plots for  $\text{VOPO}_4 \cdot n\text{H}_2\text{O}$  electrodes at open circuit potential with aqueous  $\text{Li}^+$  electrolytes at  $\text{Li}^+/\text{H}_2\text{O}$  ratio of 1:6 (LiTFSI/ $6\text{H}_2\text{O}$ ), 1:4 (LiTFSI/ $4\text{H}_2\text{O}$ ), and 1:2.5 (LiTFSI/ $2.5\text{H}_2\text{O}$ ), where the electrode potentials are 1.01, 1.02, and 1.16 V vs. Ag/AgCl, respectively.

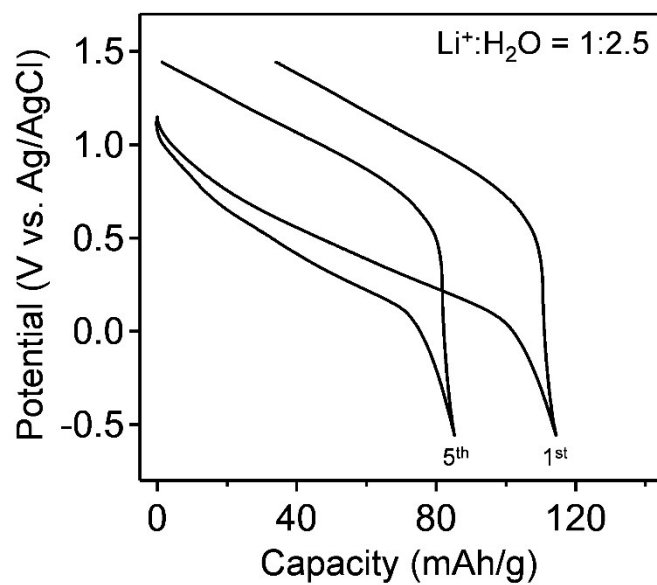

**Figure S3.** Charge/discharge curves of  $\text{VOPO}_4 \cdot n\text{H}_2\text{O}$  electrodes with aqueous  $\text{Li}^+$  electrolytes at a  $\text{Li}^+/\text{H}_2\text{O}$  ratio of 1:2.5 ( $\text{LiTFSI}/2.5\text{H}_2\text{O}$ ). A specific current is 1 A/g.

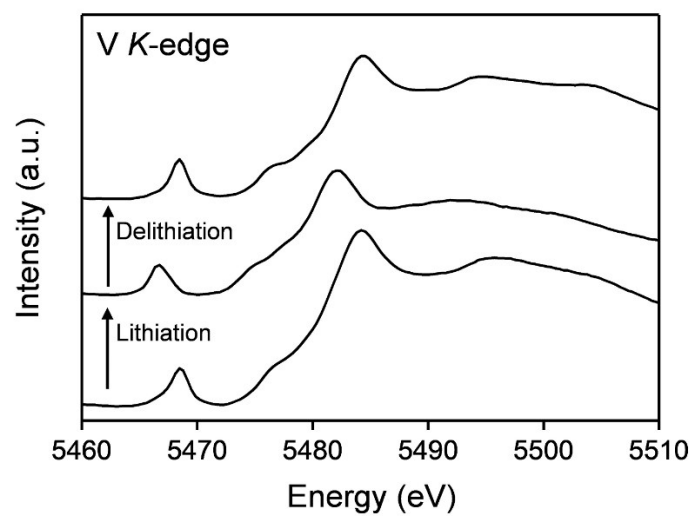

**Figure S4.** *Ex situ* XANES spectra for V *K*-edge of (de)lithiated  $\text{VOPO}_4 \cdot n\text{H}_2\text{O}$  in  $\text{LiTFSI}/4\text{H}_2\text{O}$ .

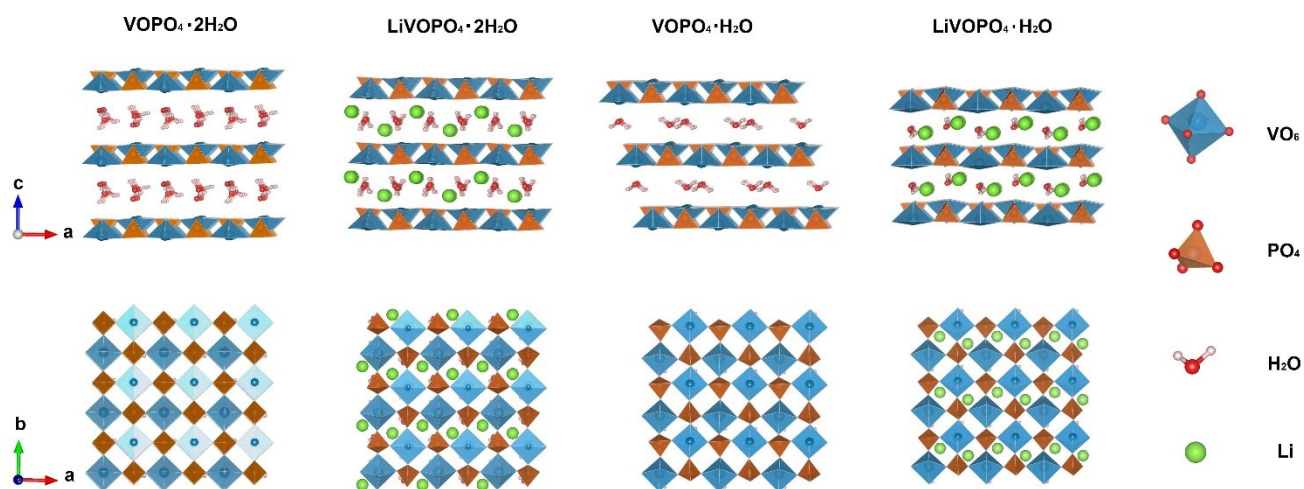

**Figure S5.** DFT+U+VDW optimized structures of VOPO<sub>4</sub>·2H<sub>2</sub>O, LiVOPO<sub>4</sub>·2H<sub>2</sub>O, VOPO<sub>4</sub>·H<sub>2</sub>O and LiVOPO<sub>4</sub>·H<sub>2</sub>O, respectively

**Table S1.** DFT+U+VDW optimized lattice parameters for selected  $\text{Li}_x\text{VOPO}_4 \cdot n\text{H}_2\text{O}$  ( $n = 0, 1$ , and 2) compound. The  $c$ -values represent the interlayer distance.

|                                             | $a / \text{\AA}$ | $b / \text{\AA}$ | $c / \text{\AA}$ | $\alpha / ^\circ$ | $\beta / ^\circ$ | $\gamma / ^\circ$ |
|---------------------------------------------|------------------|------------------|------------------|-------------------|------------------|-------------------|
| $\text{VOPO}_4 \cdot 2\text{H}_2\text{O}$   | 6.26             | 6.21             | 7.25             | 91.7              | 90               | 90                |
| $\text{LiVOPO}_4 \cdot 2\text{H}_2\text{O}$ | 6.32             | 6.42             | 6.56             | 90                | 75               | 90                |
| $\text{VOPO}_4 \cdot \text{H}_2\text{O}$    | 6.25             | 6.24             | 6.16             | 105.3             | 90.6             | 90                |
| $\text{LiVOPO}_4 \cdot \text{H}_2\text{O}$  | 6.39             | 6.45             | 5.53             | 105.6             | 91.5             | 89.8              |
